# Supplementary material
Source: publisher figshare collection journal article supplement (https://gsajournals.figshare.com/ndownloader/files/23665604)
Supplement: Supplementary file 1 [file 23665604]

## Sheet: Sheet 1
Table S2. List of primers for RT-qPCR used in the study.
Gene	Forward Primer 5'-3'	Reverse Primer 5'-3'	Reference
ACT1	GGCTTCTTTGACTACCTTCCAACA	GATGGACCACTTTCGTCGTATTC	(Chow et al., 2019b)
FLO11	CACTTTTGAAGTTTATGCCACACAAG	CTTGCATATTGAGCGGCACTAC	(Chen and Fink, 2006)
DSE1	GGACCAAATGGCATCTCGCT	CCACATCCTGCAGATATGCT	This study
DSE2	TTCCGCAGTTGAGTCATCCC	ATGGCATGGATGTCGTTGCT	This study
DSE4	GGACCAGACGATTTAACCTC	AGACCATCAACACTAGCGCT	This study
SCW11	TGCAGACGCTGTCTCTTCTG	GTTTTACGGCTGCTGGTTGG	This study
NFG1	CACCACCTCTTCCAGCATTA	CGCTGGAAGTGACTTTTGGT	This study
RGD2	ATGTGGCCAGGGAAAAGGAT	AACAGCTGAAGCGTCTCCTT	This study
RPI1	TCGAACTCCAACTCCAACTC	CTTGCAGACGAGGAGGATGA	This study
TIP1	TCTGAAATCGCTGCTGCTCT	GGCAGAGGATGTAGCTTCGG	This study
SFG1	TAAAGAAGCACTGGAGCTCC	GTGGCACATCACTGTTGGAT	This study
